# Supplementary material
Source: PubMed Central journal article supplement (PMC6561273)
Supplement: pnas.1900890116.sapp.pdf [file pnas.1900890116.sapp.pdf]

## Supporting Information

# Assembly of the Complexes of Oxidative Phosphorylation Triggers the Remodeling of Cardiolipin

Yang Xu<sup>1</sup>, Murari Anji<sup>3</sup>, Alec Donelian<sup>1</sup>, Wenxi Yu<sup>4</sup>, Miriam L. Greenberg<sup>4</sup>, Mindong Ren<sup>1, 2</sup>, Edward Owusu-Ansah<sup>3</sup>, Michael Schlame<sup>1, 2</sup>

<sup>1</sup>Department of Anesthesiology and <sup>2</sup>Department of Cell Biology, New York University School of Medicine, New York, USA; <sup>3</sup>Department of Physiology and Cellular Biophysics, Columbia University Medical Center, New York, USA; <sup>4</sup>Department of Biological Sciences, Wayne State University, Detroit, USA

## MATERIALS AND METHODS

### Yeast strains and growth conditions

*Saccharomyces cerevisiae* strains, including wild-type (BY4741; *MATa his3Δ1 leu2Δ0 met15Δ0 ura3Δ0*), the tafazzin deletion strain (*taz1Δ; MATa his3Δ1 leu2Δ0 met15Δ0 ura3Δ0 taz1Δ::KanMX6*), the CL deacylase deletion strain (*clد1Δ; MATa his3Δ1 leu2Δ0 met15Δ0 ura3Δ0 clد1Δ::KanMX6*), the double deletion strain (*clد1Δtaz1 Δ; MATa his3Δ1 leu2Δ0 met15Δ0 ura3Δ0 clد1Δ::KanMX6 taz1Δ::KanMX6*), and their *rho*<sup>0</sup> derivatives, were previously described (1). Strains with knockouts of various mitochondrial proteins, including the wild-type parent strain BY4743, were obtained from the Yeast Knockout Collection of Dharmacon (<http://dharmacon.gelifsciences.com>). Yeast cells were grown at 30°C in YPD medium containing 10 g/L yeast extract, 20 g/L peptone, and 20 g/L dextrose, or in YPGE medium containing 10 g/L yeast extract, 20 g/L peptone, 3% glycerol, and 3% ethanol. For the culture of knockout strains from the Dharmacon Knockout Collection, the medium was supplemented with 0.2 g/L G418. Cells were harvested in mid-logarithmic or in stationary phase as indicated and stored frozen at -80 °C. In order to break the cell wall, the yeast cell pellets were digested in a medium containing 1.2 M glycerol, 100 mM sodium thioglycolate, 50 mM Tris-SO<sub>4</sub> (pH 7.5) and 1 g/L zymolyase for 15 min at room temperature.

### Schneider cells and knockdown conditions

*Drosophila melanogaster* Schneider 2 (S2) cells were cultured at 23°C in Schneider's *Drosophila* medium (Gibco #21720-024) supplemented with 10% fetal bovine serum (Life Technologies #16000044), 100 IU/mL penicillin, 100 µg/mL streptomycin, and 292 µg/mL L-glutamine. In order to obtain knockdown reagents, double-stranded RNAs (dsRNA) were synthesized from DNA templates using the MEGASCRIPT T7 Transcription Kit from Ambion (AM1334) and purified with QIAGEN RNeasy Mini Kits. The template DNAs were obtained from the *Drosophila* RNAi Screening Center (DRSC) of Harvard Medical School and PCR amplified with the T7 promoter primer 5'-TAATACGACTCACTATAGGG-3'. For the knockdown experiments, S2 cells were suspended at a concentration of 4x10<sup>6</sup>/mL in serum-free Schneider's *Drosophila* medium. An aliquot of 0.1 mL (4x10<sup>5</sup> cells) was added per well of a 24-well plate and mixed with 9 µg dsRNA. After 2 hours at 23 °C, the baiting period was terminated by addition of 0.6 mL Schneider's *Drosophila* medium supplemented with 10% fetal bovine serum. The cells were then incubated for four days at 23-25 °C. Cells were harvested and processed for lipid analysis, Western blotting, and analysis of RNAi efficiency by quantitative RT-PCR.

### *Drosophila* strains and genetics

Fly strains with tafazzin deletion ( $\Delta$ TAZ, on the 2nd chromosome) were created by imprecise excision of P elements (2). The transgenic strain UAS-dPGC-1 (on the 3rd chromosome) was provided by David Walker, University of California at Los Angeles. The transgenic strain UASp-SIRT1 (on the 2nd chromosome) was obtained from the Bloomington *Drosophila* Stock Center (Stock No. 44216). The ubiquitous GAL4 driver line daughterless (da)-GAL4 (on the 3rd chromosome) was provided by Jessica Treisman, NYU School of Medicine.  $\Delta$ TAZ and UASp-SIRT1 were recombined into the same 2nd chromosome to generate the  $\Delta$ TAZ; UASp-SIRT1 strain. The strains  $\Delta$ TAZ; da-GAL4 and  $\Delta$ TAZ; UAS-dPGC-1 were generated by routine crosses. To overexpress *Drosophila* PGC-1 or SIRT1 in the  $\Delta$ TAZ background, the strain  $\Delta$ TAZ; da-GAL4 was crossed with the strain  $\Delta$ TAZ; UAS-dPGC-1 or the strain  $\Delta$ TAZ;

UASp-SIRT1, respectively. For muscle-specific knockdowns, females from *Dmef2*-Gal4 or *Mhc*-Gal4 (PMID 8893022) stocks were genetically crossed to male transgenic UAS-RNAi stocks from the Bloomington Drosophila Stock Center. The following transgenic UAS-RNAi stocks were used:

y[1] v[1]; P{y[+t7.7]=CaryP}attP2 (Bloomington, #36303, control),  
y[1] v[1]; P{y[+t7.7]=CaryP}attP40 (Bloomington, #36304, control),  
y[1] sc[\*] v[1]; P{y[+t7.7] v[+t1.8]=TRiP.HMS01590}attP2 (Bloomington, #36701, RNAi to NDUFV1),  
y[1] sc[\*] v[1]; P{y[+t7.7] v[+t1.8]=TRiP.HMC05884}attP40 (Bloomington, #65010, RNAi to NDUFA6)  
y[1] sc[\*] v[1]; P{y[+t7.7] v[+t1.8]=TRiP.HMS01584}attP2 (Bloomington, #36695, RNAi to NDUFA12)  
y[1] sc[\*] v[1]; P{y[+t7.7] v[+t1.8]=TRiP.HM05255}attP2/TM3, Sb[1] (Bloomington, #30511, RNAi to NDUFB7)  
y[1] sc[\*] v[1]; P{y[+t7.7] v[+t1.8]=TRiP.HMS01560}attP2 (Bloomington, #36672, RNAi to NDUFB11)  
y[1] v[1]; P{y[+t7.7] v[+t1.8]=TRiP.HM05059}attP2 (Bloomington, #28573, RNAi to NDUFS2)  
y[1] v[1]; P{y[+t7.7] v[+t1.8]=TRiP.HMC02929}attP40 (Bloomington, #44535, RNAi to NDUFS3)  
y[1] sc[\*] v[1]; P{y[+t7.7] v[+t1.8]=TRiP.HMC03861}attP40 (Bloomington, #55180, RNAi to NDUFS5)  
y[1] v[1]; P{y[+t7.7] v[+t1.8]=TRiP.HMC03497}attP40 (Bloomington, #53281, RNAi to Sdhc)  
y[1] sc[\*] v[1]; P{y[+t7.7] v[+t1.8]=TRiP.HMC05914}attP40 (Bloomington, #65040, RNAi to SdhD)  
y[1] sc[\*] v[1]; P{y[+t7.7] v[+t1.8]=TRiP.HMS01057}attP2 (Bloomington, #34583, RNAi to Cytc1)  
y[1] sc[\*] v[1]; P{y[+t7.7] v[+t1.8]=TRiP.HMC03242}attP2 (Bloomington, #51357, RNAi to UQCR-Q)  
y[1] sc[\*] v[1]; P{y[+t7.7] v[+t1.8]=TRiP.HMC03394}attP2 (Bloomington, #51822, RNAi to UQCR-C1)  
y[1] v[1]; P{y[+t7.7] v[+t1.8]=TRiP.HMJ22367}attP40 (Bloomington, #58282, RNAi to COX5A)  
y[1] sc[\*] v[1]; P{y[+t7.7] v[+t1.8]=TRiP.HMS00815}attP2 (Bloomington, #33878, RNAi to COX6C)  
y[1] sc[\*] v[1]; P{y[+t7.7] v[+t1.8]=TRiP.HMC05771}attP40 (Bloomington, #64898, RNAi to Cyt c)  
y[1] v[1]; P{y[+t7.7] v[+t1.8]=TRiP.HMJ21900}attP40/CyO (Bloomington, #57853, RNAi to Cyt c)  
y[1] v[1]; P{y[+t7.7] v[+t1.8]=TRiP.JF03150}attP2/TM3, Sb[1] (Bloomington, #28723, RNAi to ATPsyn $\gamma$ ),  
y[1] v[1]; P{y[+t7.7] v[+t1.8]=TRiP.JF02896}attP2 (Bloomington, #28059, RNAi to ATPsyn- $\alpha$ )  
y[1] v[1]; P{y[+t7.7] v[+t1.8]=TRiP.JF02792}attP2 (Bloomington, #27712, RNAi to ATPsyn- $\beta$ )  
y[1] v[1]; P{y[+t7.7] v[+t1.8]=TRiP.JF02899}attP2 (Bloomington, #28062, RNAi to ATPsyn-b)  
y[1] sc[\*] v[1]; P{y[+t7.7] v[+t1.8]=TRiP.HMC03581}attP40 (Bloomington, #53352, RNAi to ATP12)  
y[1] sc[\*] v[1]; P{y[+t7.7] v[+t1.8]=TRiP.HMS01549}attP2 (Bloomington, #36661, RNAi to SesB),  
y[1] sc[\*] v[1]; P{y[+t7.7] v[+t1.8]=TRiP.HMS02631}attP40 (Bloomington, #42938, RNAi to mRpS29),  
y[1] v[1]; P{y[+t7.7] v[+t1.8]=TRiP.JF01564}attP2 (Bloomington, #31099, RNAi to TAZ),  
y[1] v[1]; P{y[+t7.7] v[+t1.8]=TRiP.JF01748}attP2 (Bloomington, #31694, RNAi to TAZ),  
y[1] v[1]; P{y[+t7.7] and v[+t1.8]=TRiP.HMC03231}attP40/CyO (Bloomington, #51484, RNAi to TAZ).

Overexpression of ImpL2 was achieved by crossing UAS-ImpL2 (3) to *Dmef2*-Gal4. The flies were allowed to lay eggs for 48 hours, after which they were transferred to fresh vials of food and the larvae were allowed to develop at 25°C until they emerged as adults. Subsequently, flies were harvested within 1-3 days of hatching. All flies were raised on standard fly media. To isolate thoraces, flies were immobilized by carbon dioxide and dissected under the microscope. Dissected thoraces, in which the soft tissue consists almost entirely of indirect flight muscles, were stored at -80°C.

### **Lipid analysis by mass spectrometry**

Yeast spheroblasts, S2 cell pellets, or *Drosophila thoraces* (from 15 animals) were homogenized in 0.2 mL water and supplemented by a mixture of CL standards (Cardiolipin Mix I from Avanti Polar Lipids) containing 1.115 nmol CL 57:4 and 1.013 nmol CL 61:1. Homogenates were extracted with methanol/chloroform (4). The extracts were dried under nitrogen and re-dissolved in 0.1 mL chloroform/methanol (1:1). To screen mutants and knockdowns, the CL composition was analyzed by MALDI-TOF mass spectrometry (5). Briefly, the lipid extract was diluted 1:11 in 2-propanol/acetonitrile (3:2, v/v) and a 1- $\mu$ L aliquot of that was mixed 1:1 with matrix solution containing 20 g/L 9-aminoacridine in 2-propanol/acetonitrile (3:2, v/v). One microliter of this mixture was spotted on a target plate. Measurements were performed with a MALDI Micro MX mass spectrometer (Waters) operated in reflectron mode. The pulse voltage was set to 2000 V, the detector voltage was set to 2200 V, and the TLF delay was set to 700 ns. The nitrogen laser (337 nm) was fired at a rate of 5 Hz and 10 laser shots were acquired per sub-spectrum. The instrument was operated in negative ion mode with a flight tube voltage of 12 kV, a reflectron voltage of 5.2 kV, and a negative anode voltage of 3.5 kV. We typically added 100 sub-spectra (representing 1000 laser shots) per sample in a mass range from  $m/z=400$  to  $m/z=2000$  via automatic acquisition. Spectra were only selected if their base-peak-intensity was within 10–95% of the saturation level. Data were analyzed with the MassLynx 4.1 software. To determine CL turnover or to identify CL molecular species, lipid extracts were analyzed by LC-MS/MS using the LTQ Orbitrap (Thermo Fisher Scientific) coupled to an Ascentis Express C8-reversed phase column (75x2.1 mm; 2.7  $\mu$ m) from SUPELCO. Samples were injected by a 20- $\mu$ L loop injector. A gradient was established by two conventional HPLC pumps run at a total flow rate of 0.1 mL/min. The gradient changed the solvent mixture 2-propanol/acetonitrile/water from 22.5/47.5/30 to 85.5/12.5/2 within 35 minutes under the continuous presence of 0.1% formic acid and 10 mM ammonium formate. The total run time was 90 minutes. The mass spectrometer was operated in negative ion mode using the instrument settings established by the automated tuning program. Data were acquired in centroid mode from  $m/z=300$  to  $m/z=2000$ . The resolution was set to 60,000.

### **Measurement of lipid turnover with stable isotopes**

The turnover of lipids was measured by isotopomer spectral analysis, which requires the incorporation of isotope-labeled metabolites. To incorporate labeled fatty acids into yeast, the YPGE medium was supplemented with 1 mM  $^2\text{H}_{33}$ -oleic acid and cells were cultured for 24 hours at 30°C. The labeled fatty acid was added as a 40 mM stock solution in 10% Brij58. To incorporate  $^{13}\text{C}$  into *Drosophila*, adult flies were kept in vials that contained 0.2 mL of 1M  $^{13}\text{C}_6$ -glucose placed on a piece of filter paper (0.5 x 0.5 inch) as the only nutrient. Flies were maintained under these conditions for up to 2 weeks while the labeled glucose solution was replenished every 4 days. In most experiments, flies were incubated for 3 days only. After labeling thoraces were dissected, lipids were extracted, and analyzed by LC-MS/MS. The isotopomer distribution of a given species was measured in MS1 sub-spectra acquired over a 0.2-minute window centered at the peak retention time of that species. Data were extracted manually via the Quality Browser of XCalibur (Thermo Scientific). Fractional syntheses were estimated by isotopomer spectral analysis (6) as described in detail in a previous paper (7). Lipid turnover was also estimated by mass shifts as a result of  $^2\text{H}$  incorporation. To this end, flies were incubated for 2 days on Instant *Drosophila* medium (Formula 4-24 from the Carolina Biological Supply Company) dissolved in  $^2\text{H}_2\text{O}$  at a

concentration of 200 g/L. Under these conditions, <sup>2</sup>H entered lipids mainly through the de novo synthesis of palmitic acid. Again, lipids were extracted from fly thoraces and analyzed by LC-MS/MS. Mass shifts of CL species were calculated from MS1 sub-spectra.

### **BN-PAGE and Western blot analysis**

BN-PAGE was performed using NativePAGE gels from Life Technologies, following the manufacturer's instructions. All other reagents used for BN-PAGE were also obtained from Life Technologies. Mitochondria were prepared from fly thorax homogenates (8) and suspended in NativePAGE sample buffer supplemented with 1% digitonin and protease inhibitors. They were incubated on ice for 20 minutes. Following centrifugation at 20,000 g for 30 minutes, the supernatant was recovered, mixed with the G-250 sample additive and NativePAGE sample Buffer, and loaded onto 3–12% pre-cast Bis–Tris NativePAGE gels. Electrophoresis was performed using the NativePAGE running buffer (anode buffer) and the NativePAGE running buffer containing 0.4% Coomassie G-250 (cathode buffer). Silver staining of native gels was performed with the SilverXpress staining kit from Life Technologies. For Western blot analysis, proteins were separated by SDS-PAGE, transferred to a PVDF membrane, and incubated with primary polyclonal tafazzin antibody (1 µg/mL) in Odyssey blocking buffer containing 0.01% Tween-20. Fluorescent LiCor GAM-IRDye680 secondary antibodies were used at a dilution of 1:15,000. Proteins were visualized and quantified using the LiCor scanner.

### **REFERENCES**

1. Ye C, et al. (2014) Deletion of the cardiolipin-specific phospholipase Cld1 rescues growth and life span defects in the tafazzin mutant: implications for Barth syndrome. *J Biol Chem* 289:3114-3125
2. Xu Y, et al. (2006) A *Drosophila* model of Barth syndrome. *Proc Natl Acad Sci USA* 103:11584-11588
3. Honegger B, et al. (2008) Imp-L2, a putative homolog of vertebrate IGF-binding protein 7, counteracts insulin signaling in *Drosophila* and is essential for starvation resistance. *Journal of Biology* doi: 10.1186/jbiol72
4. Bligh EG, Dyer WJ (1959) A rapid method of total lipid extraction and purification. *Can J Biochem Physiol* 37:911-917
5. Sun G, et al. (2008) Matrix-assisted laser desorption/ionization time-of-flight mass spectrometric analysis of cellular glycerophospholipids enabled by multiplexed solvent dependent analyte-matrix interactions. *Anal Chem* 80:7576-7585
6. Kelleher JK, Masterson TM (1992) Model equations for condensation biosynthesis using stable isotopes and radioisotopes. *Am J Physiol* 262:E118-E125
7. Xu Y, et al. (2016) Loss of protein association causes cardiolipin degradation in Barth syndrome. *Nature Chem Biol* 12:641-647
8. Garcia CJ, Khajeh J, Coulanges E, Chen EI, Owusu-Ansah E (2017) Regulation of Mitochondrial Complex I Biogenesis in *Drosophila* Flight Muscles. *Cell Rep* 20:264-278

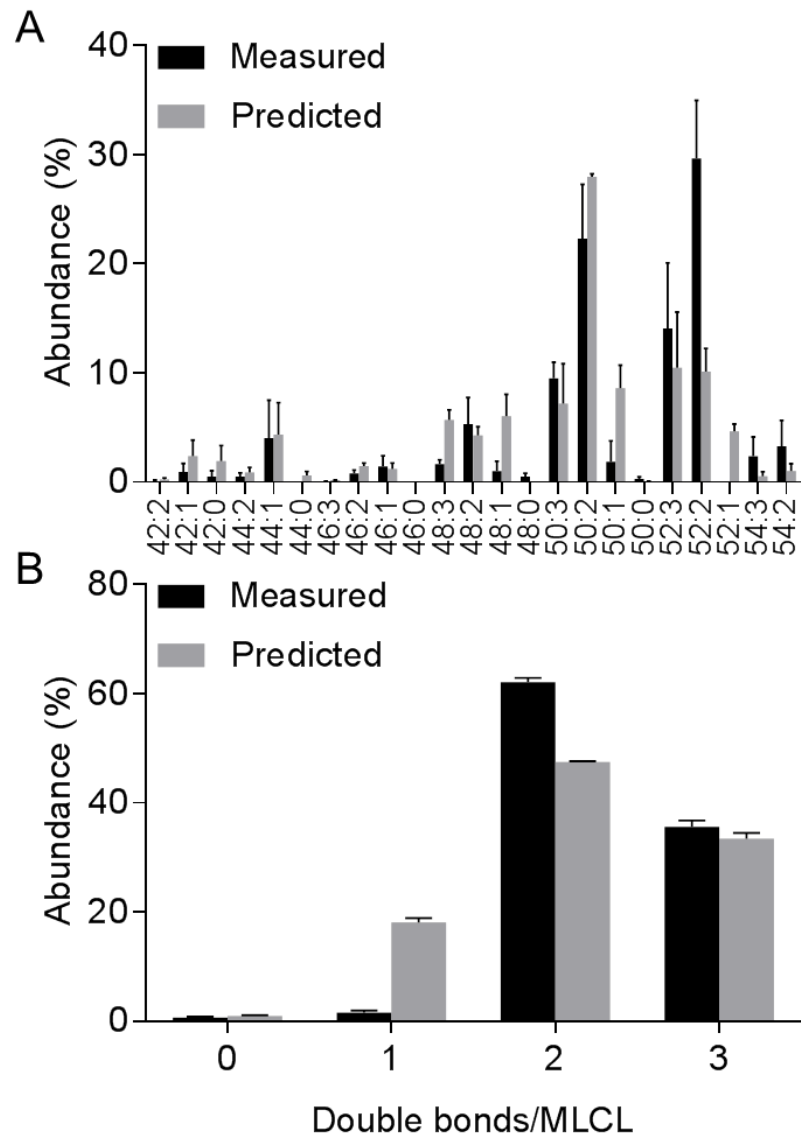

**Figure S1. Cld1 selectively removes saturated acyl groups from CL. A-B:** The *taz1Δ* yeast strain was grown in YPGE to the stationary phase. Lipids were analyzed by LC-MS. The graphs show the composition of MLCL measured by MS and the composition of MLCL predicted from the composition of CL assuming random cleavage of acyl groups. Data are mean values with ranges of duplicate measurements.

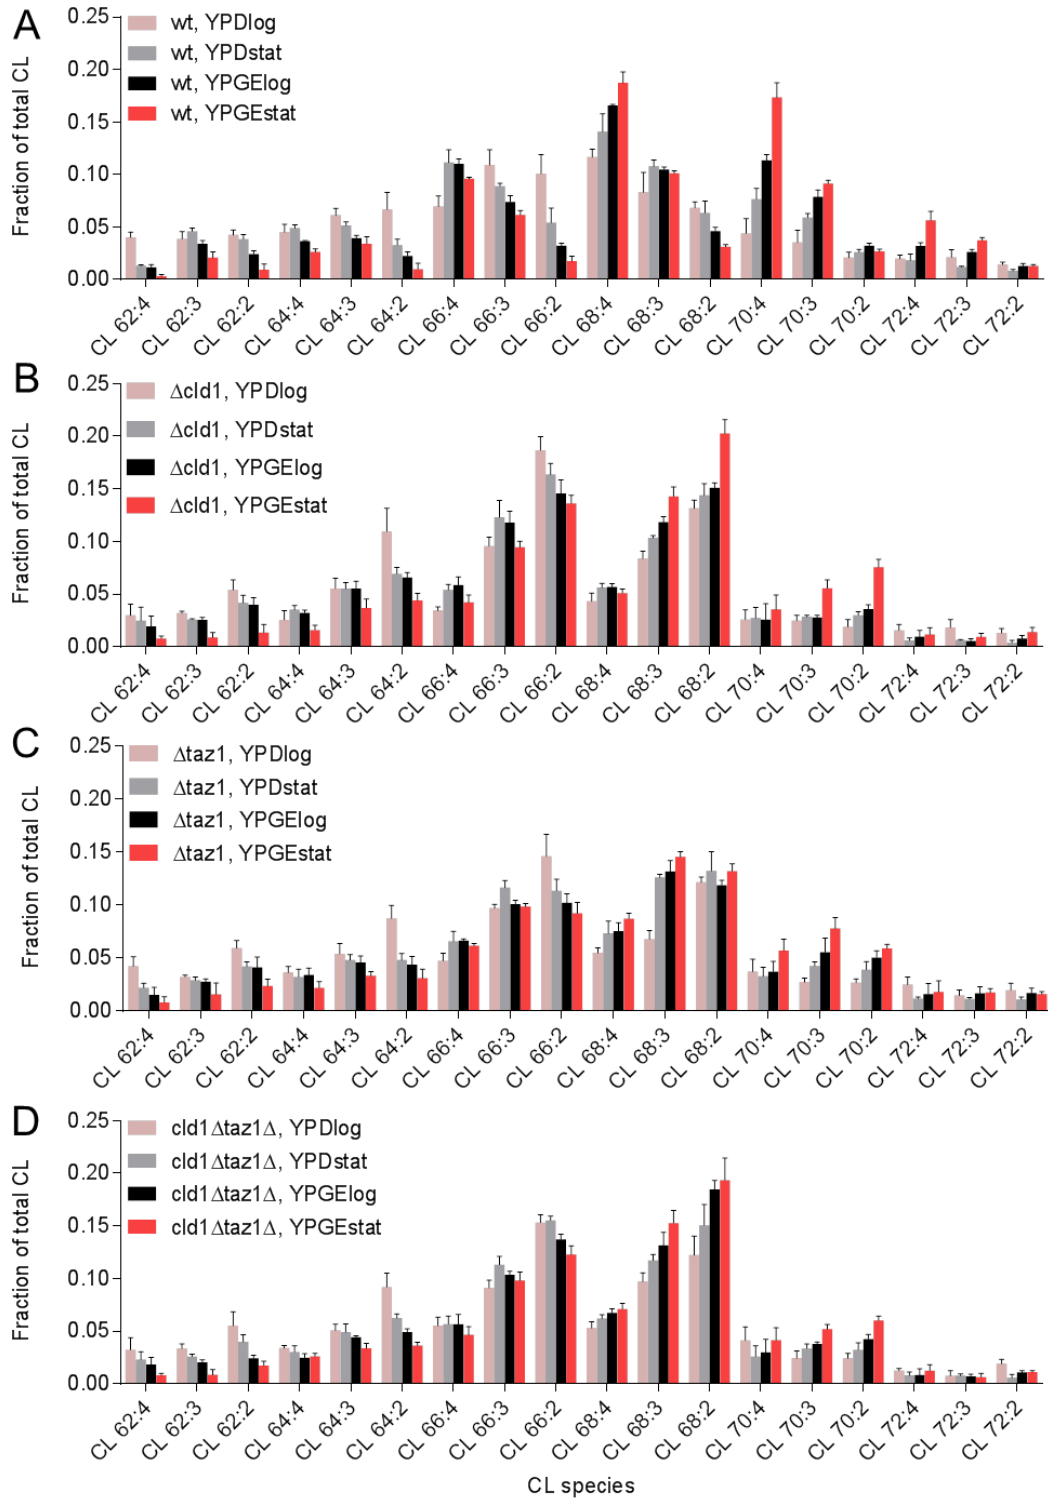

**Figure S2. Culture conditions affect the molecular composition of CL in yeast.** A-D: Yeast strains were grown in YPD or in YPGE. The cells were harvested either in the logarithmic (log) or in the stationary (stat) growth phase and lipids were analyzed by MS. Data are mean values with SEM (N=3).

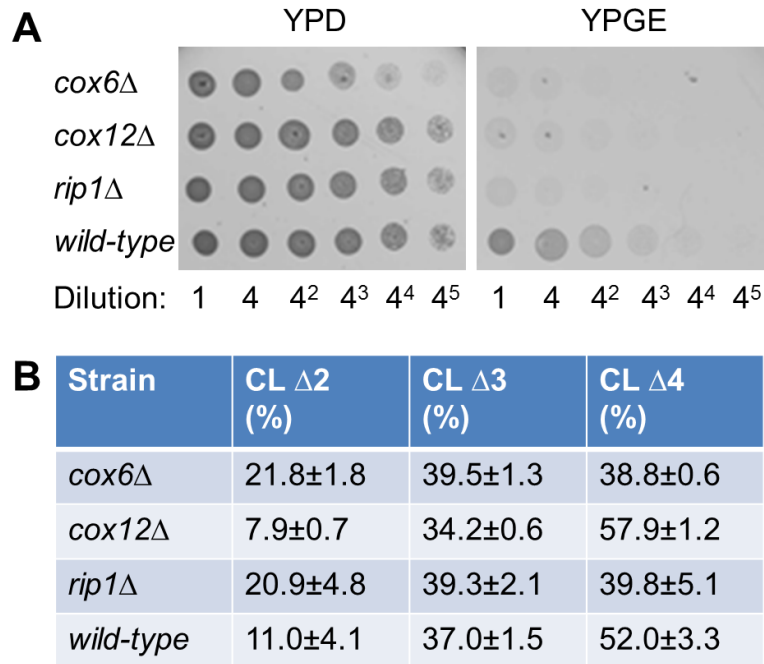

**Figure S3. Deletions of subunits *COX6*, *COX12*, and *RIP1* inhibit growth on YPGE but only deletions of *COX6* and *RIP1* alter the CL composition.** **A:** Serial dilutions of overnight YPD cultures, adjusted to a uniform optical density of 3.9, were spotted (4  $\mu$ L aliquots) on YPD or YPGE Agar plates and grown at 30°C. **B:** Yeast strains were grown in liquid YPD to stationary phase. CL was analyzed by MS. Data are mean values  $\pm$  SEM (N=3).



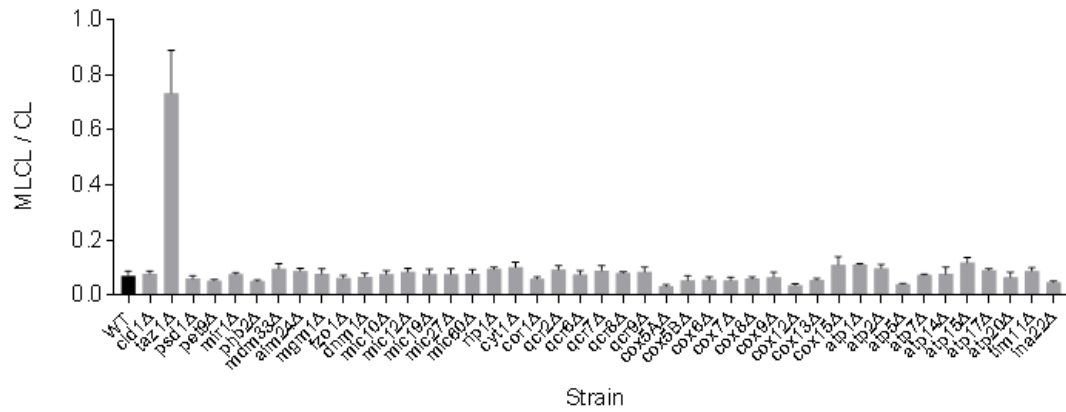

**Figure S4. Deletion of OXPHOS proteins does not increase the MLCL/CL ratio.** Yeast strains with the indicated deletions were grown in YPD to stationary phase and the MLCL/CL ratio was measured by MS. Data are mean values with SEM (N=3).

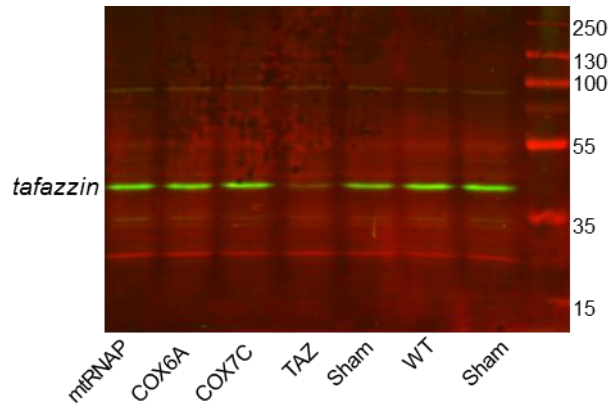

**Figure S5. Knockdowns of mitochondrial RNA polymerase (mtRNAP) and subunits 6A and 7C of cytochrome oxidase (COX6A, COX7C) do not affect the expression of tafazzin (TAZ).** Knockdowns of the indicated transcripts were performed with double-stranded RNA in S2 *Drosophila* cells. The abundance of tafazzin was measured by quantitative Western blot analysis with the LiCor system. The masses of marker proteins are given in kDa.

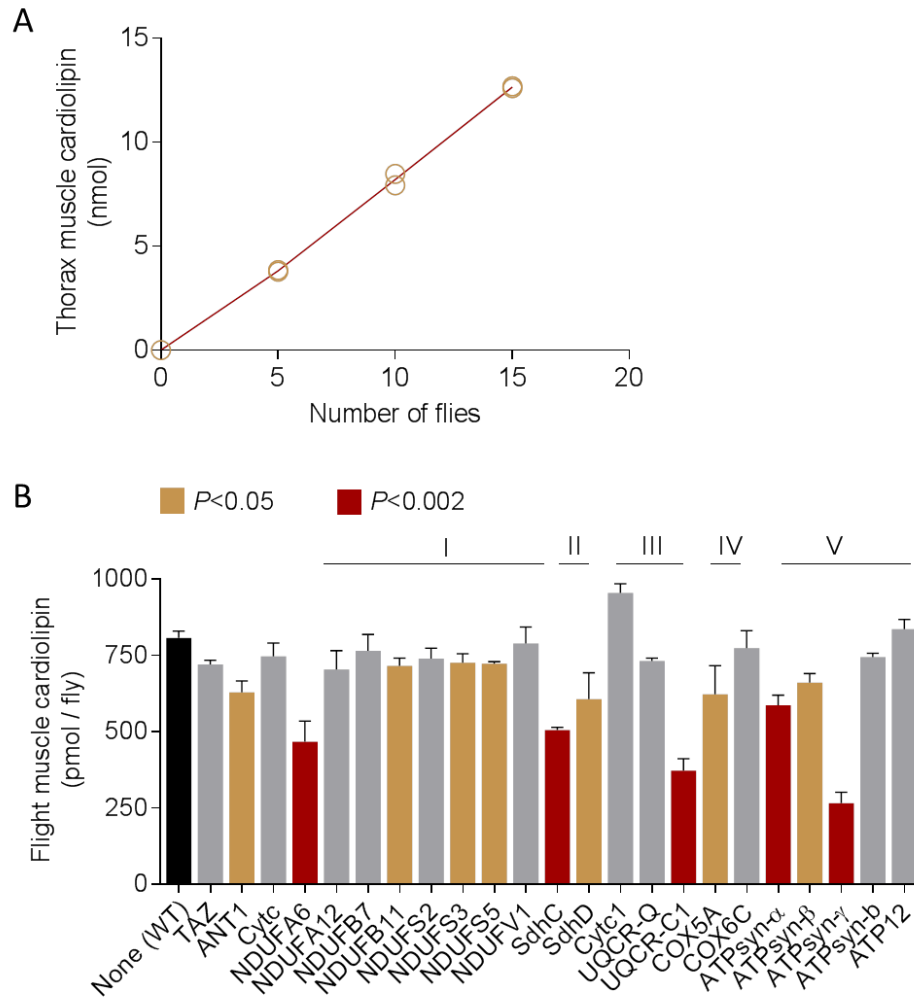

**Figure S6. Quantification of total flight muscle CL in *Drosophila*.** Fly thoraces were dissected under the microscope and stored at -80 C. Thoraces were homogenized in water, internal standards were added, and lipids were extracted. The extracts were analyzed by MS. **A:** Quantitative analysis of wild-type flies shows a linear relation between the number of dissected flies and the total amount of thorax CL. A single wild-type fly contained  $809 \pm 41$  pmol CL (mean  $\pm$  SD, N=6) in the thorax. **B:** Muscle-specific knockdowns of several subunits of the OXPHOS system decreased the amount of CL in the thorax. Bar graphs are mean values  $\pm$  SEM (N=4). Data were compared by t-test.

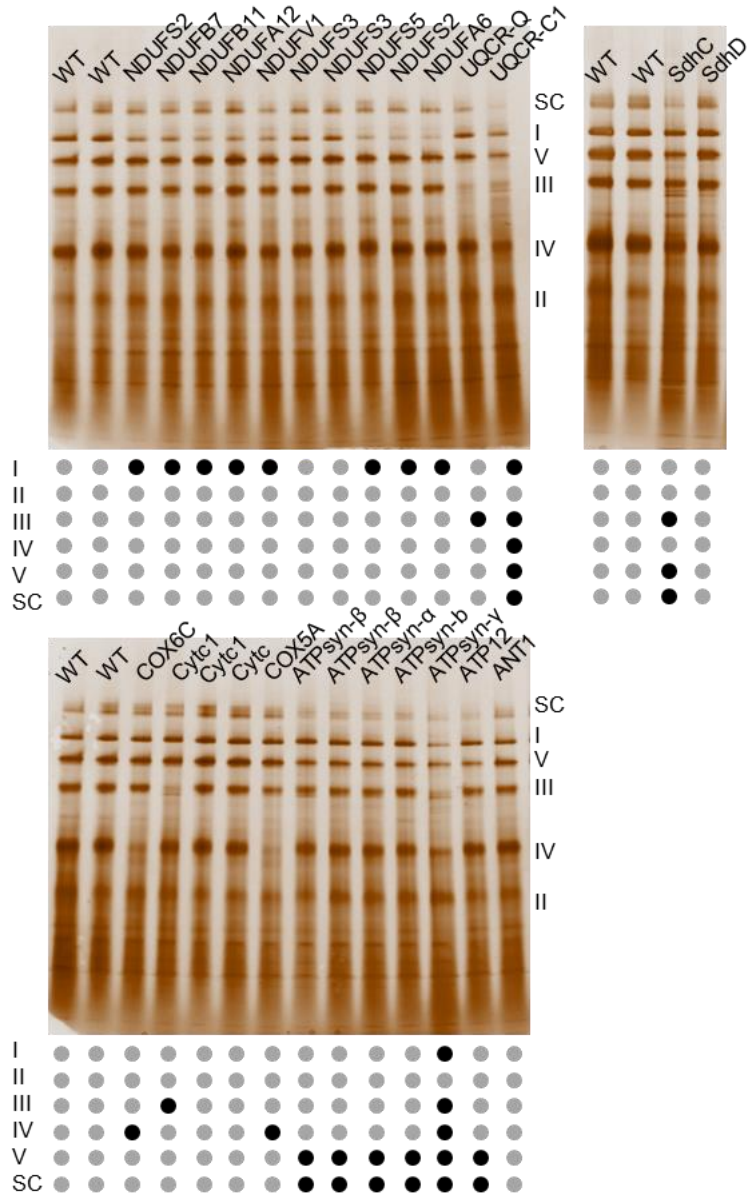

**Figure S7. Effect of subunit Knockdowns on the assembly of OXPHOS complexes.** Muscle-specific knockdowns of the indicated transcripts were achieved in adult *Drosophila* by RNAi expression using *Mhc-Gal4*. Fly thoraces were dissected and homogenized. Mitochondrial proteins were analyzed by BN-PAGE. The position of complexes I-V and the position of supercomplexes (SC, representing complex V dimers and respiratory supercomplexes) are indicated on the gels. Black dots mark complexes with reduced abundance.

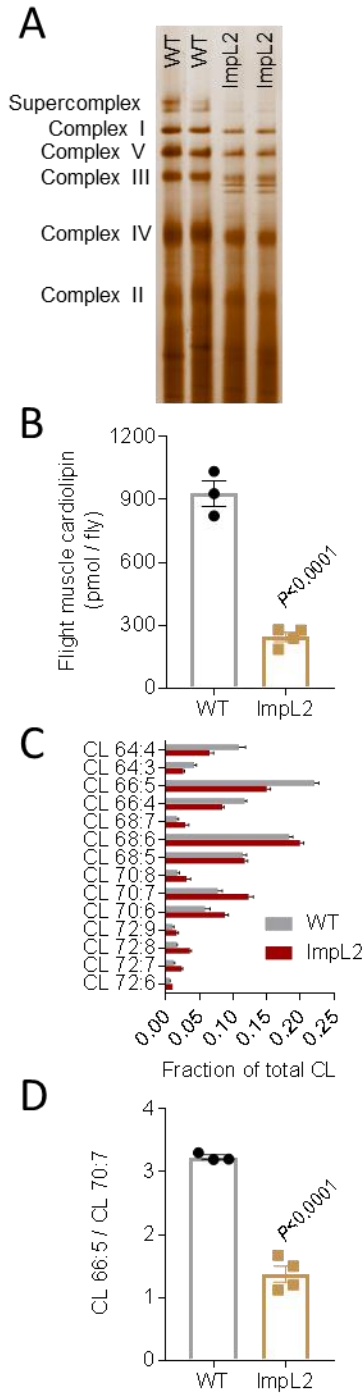

**Figure S8. Overexpression of ImpL2 reduces OXPHOS expression and alters CL composition.** Overexpression of ImpL2 was induced at the larval stage with Dmef2-Gal4. Thoraces were harvested from 3 day old adult flies. The effect on muscle OXPHOS proteins was analyzed by BN-PAGE and the effect on muscle CL was analyzed by MS. Data were compared by t-test.

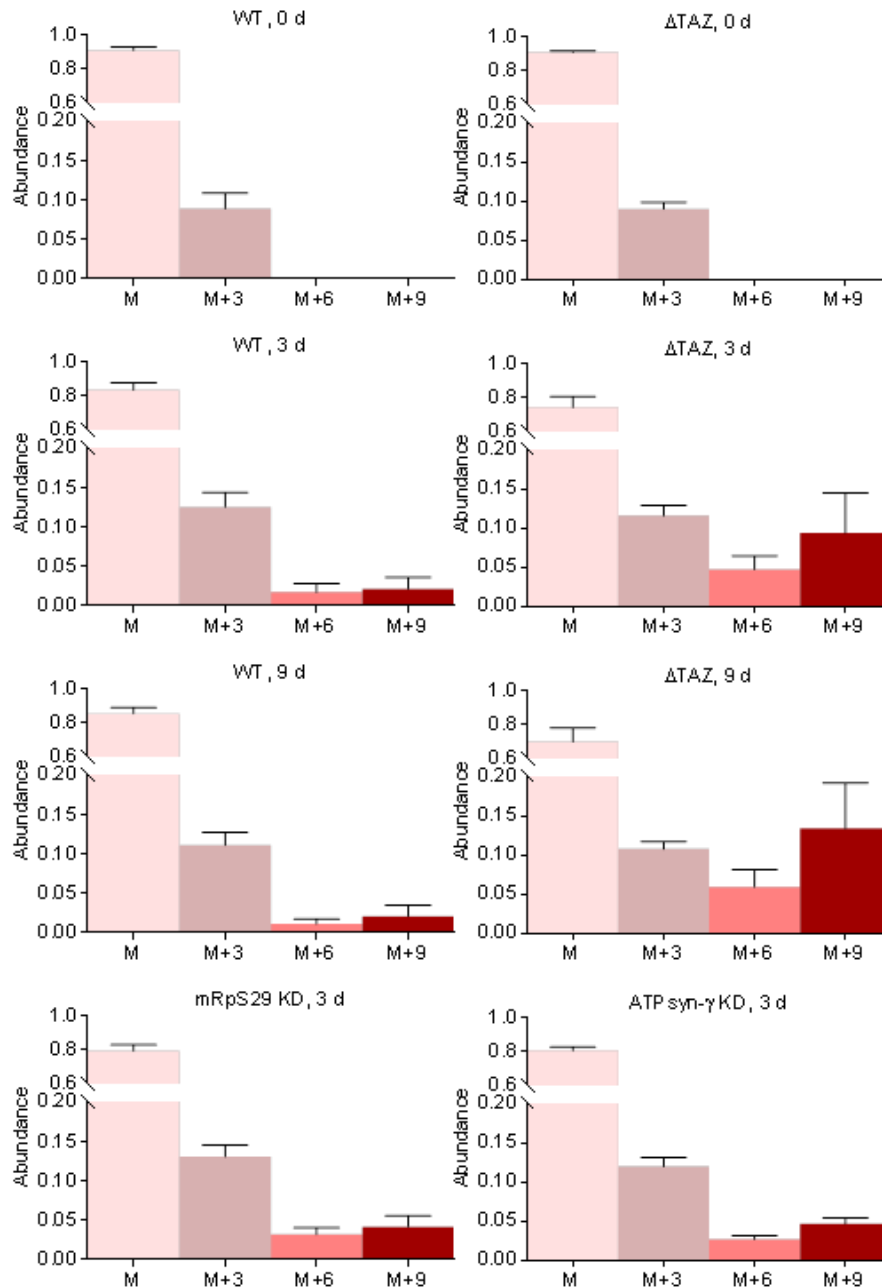

**Figure S9. Deletion of tafazzin ( $\Delta$ TAZ) and knockdowns of mitochondrial ribosomal protein S29 (mRpS29) and the  $\gamma$ -subunit of ATP synthase (ATPsyn- $\gamma$ ) increase CL turnover compared to the wild-type (WT).** Different *Drosophila* strains were cultured in the presence of  $^{13}\text{C}_6$ -glucose for the indicated periods of time. Fly thoraces were isolated to analyze CL by MS. The abundances of 4 isotopomers were measured including the monoisotopic molecule (M), the molecule with 1 labeled glycerol group (M+3), the molecule with 2 labeled glycerol groups (M+6), and the molecule with 3 labeled glycerol groups (M+9). Data, representing multiple CL species, are mean values  $\pm$  SD (N=14).

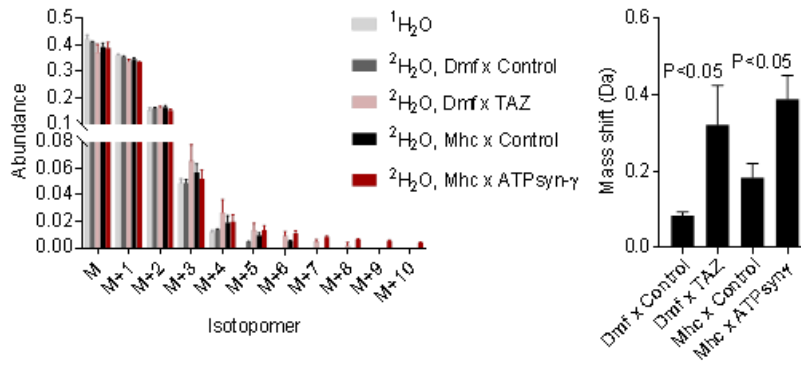

**Figure S10. Knockdown of tafazzin (TAZ) or the  $\gamma$ -subunit of the ATP synthase (ATPsyn- $\gamma$ ) increase CL turnover measured with  $^2\text{H}_2\text{O}$ .** Flies with the indicated knockdowns were cultured in the presence of  $^2\text{H}_2\text{O}$  for 2 days and the isotopomer patterns of 5 CL species from flight muscle were analyzed to determine the increase in mean molecular mass. Data are mean values  $\pm$  SEM. Data were compared by *t*-test.

Table 1. Proteins targeted in this study. The listed proteins were deleted from *S. cerevisiae* or knocked down in S2 cells or in flight muscles of *D. melanogaster*.

| Organism             | Category/complex     | Protein                                                                            | Function                                                                                                                                                                                                                                                                                                                                                                                         |
|----------------------|----------------------|------------------------------------------------------------------------------------|--------------------------------------------------------------------------------------------------------------------------------------------------------------------------------------------------------------------------------------------------------------------------------------------------------------------------------------------------------------------------------------------------|
| <i>S. cerevisiae</i> | Phospholipid enzymes | CLD1<br>TAZ1<br>PSD1                                                               | CL hydrolase<br>Phospholipid transacylase<br>Phosphatidylserine decarboxylase                                                                                                                                                                                                                                                                                                                    |
|                      | Solute carriers      | PET9<br>MIR1                                                                       | ADP-ATP carrier<br>Phosphate carrier                                                                                                                                                                                                                                                                                                                                                             |
|                      | Membrane organizers  | PHB2<br>MDM33<br>AIM24<br>MGM1<br>FZO1<br>DNM1                                     | Prohibitin complex subunit<br>Inner membrane morphology/fission<br>Inner membrane morphology, MICOS stability<br>Mitochondrial fusion<br>Mitochondrial fusion<br>Mitochondrial fission                                                                                                                                                                                                           |
|                      | MICOS complex        | MIC10<br>MIC12<br>MIC19<br>MIC12<br>MIC60                                          | MICOS complex subunit<br>MICOS complex subunit<br>MICOS complex subunit<br>MICOS complex subunit<br>MICOS complex subunit                                                                                                                                                                                                                                                                        |
|                      | Complex III          | RIP1<br>CYT1<br>COR1<br>QCR2<br>QCR6<br>QCR7<br>QCR8<br>QCR9                       | Catalytic/core subunit<br>Catalytic/core subunit<br>Accessory subunit<br>Accessory subunit<br>Accessory subunit<br>Accessory subunit<br>Accessory subunit<br>Accessory subunit                                                                                                                                                                                                                   |
|                      | Complex IV           | COX15<br>COX5A<br>COX5B<br>COX6<br>COX7<br>COX8<br>COX9<br>COX12<br>COX13          | Required for heme A synthesis<br>Accessory subunit<br>Accessory subunit<br>Accessory subunit<br>Accessory subunit<br>Accessory subunit<br>Accessory subunit<br>Accessory subunit<br>Accessory subunit                                                                                                                                                                                            |
|                      | Complex V            | ATP14<br>ATP17<br>ATP5<br>ATP7<br>ATP15<br>INA22<br>ATP1<br>ATP2<br>ATP20<br>TIM11 | Subunit h of F <sub>0</sub> subcomplex<br>Subunit f of F <sub>0</sub> subcomplex<br>Subunit 5 of stator stalk<br>Subunit d of stator stalk<br>Subunit epsilon of central stalk<br>Assembly factor of the stator stalk<br>Subunit alpha of F <sub>1</sub> subcomplex<br>Subunit beta of F <sub>1</sub> subcomplex<br>Subunit g, required for dimerization<br>Subunit e, required for dimerization |



|                        |                                 |                                                                                          |                                                                                                                                                                                                                                                                                                                                           |
|------------------------|---------------------------------|------------------------------------------------------------------------------------------|-------------------------------------------------------------------------------------------------------------------------------------------------------------------------------------------------------------------------------------------------------------------------------------------------------------------------------------------|
| <i>D. melanogaster</i> | Phospholipid enzyme             | TAZ                                                                                      | Phospholipid transacylase                                                                                                                                                                                                                                                                                                                 |
|                        | Solute carriers                 | ANT1<br>ANT2                                                                             | ADP-ATP carrier<br>ADP-ATP carrier                                                                                                                                                                                                                                                                                                        |
|                        | Membrane organizers             | OPA1<br>DRP1<br>FIS1<br>FUNDC1<br>PINK1                                                  | Mitochondrial fusion<br>Mitochondrial fission<br>Mitochondrial fission<br>Mitophagy<br>Mitophagy                                                                                                                                                                                                                                          |
|                        | MICOS complex                   | Mitofilin                                                                                | MICOS complex subunit 60                                                                                                                                                                                                                                                                                                                  |
|                        | Mitochondrial genome expression | mtRNAP<br>mRpS29                                                                         | Mitochondrial RNA polymerase<br>Mitochondrial ribosomal protein                                                                                                                                                                                                                                                                           |
|                        | Complex I                       | NDUFS1<br>NDUFS2<br>NDUFS3<br>NDUFA6<br>NDUFA12<br>NDUFB7<br>NDUFB11<br>NDUFS5<br>NDUFV1 | Core subunit of the matrix arm<br>Core subunit of the matrix arm<br>Core subunit of the matrix arm<br>Accessory subunit of the matrix arm<br>Accessory subunit of the matrix arm<br>Accessory subunit of the membrane arm<br>Accessory subunit of the membrane arm<br>Accessory subunit of the membrane arm<br>N module of the matrix arm |
|                        | Complex II                      | SdhA<br>SdhB<br>SdhC<br>SdhD                                                             | Core subunit (peripheral membrane protein)<br>Core subunit (peripheral membrane protein)<br>Core subunit (integral membrane protein)<br>Core subunit (integral membrane protein)                                                                                                                                                          |
|                        | Complex III                     | Cytc1<br>UQCR-C1<br>UQCR-Q<br>Cytc                                                       | Core/catalytic subunit<br>Core/catalytic subunit<br>Accessory subunit<br>Substrate (peripheral membrane protein)                                                                                                                                                                                                                          |
|                        | Complex IV                      | COX5A<br>COX6A<br>COX6C<br>COX7C                                                         | Subunit assembled early in complex formation<br>Subunit assembled late in complex formation<br>Subunit assembled late in complex formation<br>Subunit assembled late in complex formation                                                                                                                                                 |
|                        | Complex V                       | ATPsyn-c<br>ATPsyn- $\alpha$<br>ATPsyn- $\beta$<br>ATPsyn- $\gamma$<br>ATPsyn-b<br>ATP12 | Subunit c of F <sub>0</sub> subcomplex<br>Subunit alpha of F <sub>1</sub> subcomplex<br>Subunit beta of F <sub>1</sub> subcomplex<br>Subunit gamma of F <sub>1</sub> subcomplex<br>Subunit b of stator stalk<br>Assembly factor                                                                                                           |

Table 2. CL content of yeast. Strains were grown in YPD and harvested either in mid-logarithmic or in stationary phase. The cellular content of CL is expressed in percent of the content in wild-type yeast at stationary phase. Data are mean values  $\pm$  SEM. The number of independent measurements is given in parenthesis. Asterisks marks a statistically significant difference to the wild-type content at stationary phase (*t*-test,  $P < 0.05$ ).

| Strain         | CL content (%)        |                      |
|----------------|-----------------------|----------------------|
|                | Mid-logarithmic phase | Stationary phase     |
| wild-type      | 27.5 $\pm$ 3.3 (6)*   | 100 $\pm$ 16 (6)     |
| rho0           | 4.8 $\pm$ 0.8 (5)*    | 21.3 $\pm$ 2.5 (5)*  |
| cld1 $\Delta$  | 18.7 $\pm$ 1.3 (3)*   | 90.8 $\pm$ 9.2 (3)   |
| taz1 $\Delta$  | 24.7 $\pm$ 7.4 (3)*   | 46.6 $\pm$ 4.4 (3)*  |
| psd1 $\Delta$  | ND                    | 100.4 $\pm$ 16.8 (3) |
| pet9 $\Delta$  | ND                    | 83.8 $\pm$ 11.4 (3)  |
| mir1 $\Delta$  | ND                    | 77.3 $\pm$ 13.3 (3)  |
| phb2 $\Delta$  | ND                    | 121.2 $\pm$ 18.4 (3) |
| mdm33 $\Delta$ | ND                    | 75.7 $\pm$ 16.0 (3)  |
| mgm1 $\Delta$  | ND                    | 27.4 $\pm$ 5.3 (3)*  |
| fzo1 $\Delta$  | ND                    | 36.0 $\pm$ 7.1 (3)*  |
| dnm1 $\Delta$  | ND                    | 85.4 $\pm$ 31.5 (3)  |
| rip1 $\Delta$  | 50.0 $\pm$ 13.7 (3)   | 68.5 $\pm$ 6.6 (3)   |
| cyt1 $\Delta$  | 47.1 $\pm$ 13.3 (3)   | 59.5 $\pm$ 2.8 (3)   |
| cor1 $\Delta$  | 49.4 $\pm$ 10.6 (3)   | 105.8 $\pm$ 3.4 (3)  |
| qcr2 $\Delta$  | 35.1 $\pm$ 13.1 (3)*  | 50.5 $\pm$ 7.1 (3)   |
| qcr6 $\Delta$  | 48.2 $\pm$ 8.3 (3)    | 109.1 $\pm$ 14.7 (3) |
| qcr7 $\Delta$  | 41.8 $\pm$ 10.9 (3)   | 70.6 $\pm$ 14.6 (3)  |
| qcr8 $\Delta$  | 42.1 $\pm$ 10.5 (3)   | 68.5 $\pm$ 14.4 (3)  |
| qcr9 $\Delta$  | 56.6 $\pm$ 14.2 (3)   | 96.0 $\pm$ 19.4 (3)  |
| cox5A $\Delta$ | 38.4 $\pm$ 2.4 (6)*   | 134.7 $\pm$ 8.2 (6)  |
| cox5B $\Delta$ | 34.9 $\pm$ 2.2 (6)*   | 132.7 $\pm$ 5.9 (6)  |
| cox6 $\Delta$  | 13.6 $\pm$ 0.9 (6)*   | 52.7 $\pm$ 6.6 (6)*  |
| cox7 $\Delta$  | 38.6 $\pm$ 1.6 (6)*   | 145.4 $\pm$ 24.4 (6) |
| cox8 $\Delta$  | 45.5 $\pm$ 4.6 (6)*   | 133.5 $\pm$ 6.1 (6)  |
| cox9 $\Delta$  | 10.7 $\pm$ 1.2 (6)*   | 36.6 $\pm$ 2.2 (6)*  |
| cox12 $\Delta$ | 29.1 $\pm$ 2.8 (6)*   | 120.9 $\pm$ 20.7 (6) |
| cox13 $\Delta$ | 40.0 $\pm$ 2.7 (6)*   | 114.9 $\pm$ 4.5 (6)  |
| cox15 $\Delta$ | 25.3 $\pm$ 5.5 (6)*   | 45.5 $\pm$ 2.6 (6)*  |
| atp1 $\Delta$  | 37.6 $\pm$ 15.7 (3)*  | 62.2 $\pm$ 7.3 (3)   |
| atp2 $\Delta$  | 38.4 $\pm$ 12.1 (3)*  | 68.1 $\pm$ 3.8 (3)   |
| atp5 $\Delta$  | 29.7 $\pm$ 1.7 (3)*   | 60.3 $\pm$ 8.8 (3)   |
| atp7 $\Delta$  | 52.4 $\pm$ 16.9 (3)   | 115.6 $\pm$ 17.0 (3) |
| atp14 $\Delta$ | 29.5 $\pm$ 12.8 (3)*  | 39.9 $\pm$ 7.8 (3)*  |
| atp15 $\Delta$ | 25.5 $\pm$ 4.8 (3)*   | 28.4 $\pm$ 2.9 (3)*  |
| atp17 $\Delta$ | 30.5 $\pm$ 6.5 (3)*   | 50.8 $\pm$ 18.4 (3)  |
| ina22 $\Delta$ | 43.9 $\pm$ 5.1 (3)    | 137.5 $\pm$ 17.2 (3) |

Table 3. RNAi efficiencies in S2 Drosophila cell cultures. Transcripts of the indicated genes were knocked down by addition of double-stranded RNA. The knockdown efficiencies were measured by quantitative RT-PCR. Data are mean values  $\pm$  SD (N=4).

| Gene      | Knockdown efficiency (%) |
|-----------|--------------------------|
| TAZ       | 67 $\pm$ 13              |
| ANT2      | 63 $\pm$ 18              |
| ND30      | 63 $\pm$ 12              |
| ND75      | 95 $\pm$ 6               |
| SdhA      | 44 $\pm$ 15              |
| SdhB      | 88 $\pm$ 15              |
| UQCR-C1   | 75 $\pm$ 30              |
| COX6A     | 82 $\pm$ 19              |
| COX7C     | 68 $\pm$ 26              |
| ATPsyn-c  | 70 $\pm$ 16              |
| mtRNAP    | 76 $\pm$ 10              |
| Mitofilin | 62 $\pm$ 4               |
| OPA1      | 52 $\pm$ 6               |
| DRP1      | 62 $\pm$ 7               |
| FIS1      | 60 $\pm$ 11              |
| FUNDC1    | 50 $\pm$ 32              |
| PINK1     | 94 $\pm$ 8               |

Table 4. Cardiolipin composition in *Drosophila* flight muscles of various knockdown strains. Lipids were extracted from fly thoraces and analyzed by MALDI-TOF MS. The molecular species of the CL groups were identified by LC-MS/MS using an LTQ-Orbitrap. Data are mean values with SD of 4 independent measurements.

| Knockdown target:<br>CL group | Major species       | TAZ       |      | ANT   |      | CytC  |      | NDUFA6  |      | NDUFA12  |      | NDUFB7 |      | NDUFB11 |      | NDUFS2 |      | NDUFS3 |      | NDUFS5 |      | NDUFV1 |       |
|-------------------------------|---------------------|-----------|------|-------|------|-------|------|---------|------|----------|------|--------|------|---------|------|--------|------|--------|------|--------|------|--------|-------|
|                               |                     | Mean      | SD   | Mean  | SD   | Mean  | SD   | Mean    | SD   | Mean     | SD   | Mean   | SD   | Mean    | SD   | Mean   | SD   | Mean   | SD   | Mean   | SD   | Mean   | SD    |
| Distribution (%)              |                     | None (WT) |      | ANT   |      | CytC  |      | NDUFA6  |      | NDUFA12  |      | NDUFB7 |      | NDUFB11 |      | NDUFS2 |      | NDUFS3 |      | NDUFS5 |      | NDUFV1 |       |
| CL 64:4                       | 16:1/16:1/16:1/16:1 | 4.45      | 0.42 | 3.93  | 0.70 | 4.15  | 0.51 | 3.36    | 0.51 | 4.35     | 0.53 | 3.51   | 0.52 | 4.39    | 0.38 | 3.68   | 0.33 | 3.40   | 0.29 | 4.34   | 0.08 | 4.73   | 0.07  |
| CL 66:6                       | 16:1/16:1/16:1/18:3 | 2.63      | 0.57 | 2.13  | 0.37 | 2.34  | 0.65 | 1.90    | 0.20 | 2.43     | 0.28 | 1.67   | 0.22 | 2.03    | 0.20 | 1.76   | 0.19 | 1.91   | 0.21 | 2.20   | 0.17 | 2.53   | 0.14  |
| CL 66:5                       | 16:1/16:1/16:1/18:2 | 13.55     | 1.18 | 8.97  | 0.66 | 8.04  | 0.82 | 9.86    | 0.40 | 13.94    | 1.06 | 10.30  | 0.31 | 8.89    | 0.45 | 11.59  | 0.42 | 9.54   | 0.98 | 10.10  | 0.27 | 11.80  | 0.09  |
| CL 68:7                       | 16:1/16:1/18:2/18:3 | 5.40      | 0.99 | 5.33  | 0.20 | 5.38  | 1.85 | 4.91    | 0.38 | 4.99     | 1.18 | 4.90   | 0.72 | 4.05    | 0.29 | 4.62   | 0.27 | 4.33   | 0.74 | 5.40   | 0.25 | 6.06   | 0.18  |
| CL 68:6                       | 16:1/16:1/18:2/18:2 | 24.50     | 1.12 | 20.43 | 0.44 | 18.59 | 1.15 | 22.95   | 0.59 | 25.30    | 0.56 | 21.75  | 0.47 | 20.76   | 0.62 | 23.38  | 0.96 | 21.45  | 1.01 | 21.52  | 0.39 | 22.76  | 0.40  |
| CL 70:8                       | 16:1/18:2/18:2/18:3 | 6.80      | 0.73 | 8.46  | 0.40 | 8.20  | 1.80 | 7.37    | 0.62 | 6.76     | 1.40 | 6.94   | 0.47 | 7.01    | 0.60 | 6.89   | 0.46 | 7.43   | 0.45 | 7.66   | 0.17 | 8.09   | 0.25  |
| CL 70:7                       | 16:1/18:2/18:2/18:2 | 25.83     | 1.36 | 27.55 | 1.13 | 27.75 | 1.83 | 28.56   | 0.64 | 25.25    | 2.84 | 27.86  | 0.53 | 29.41   | 1.24 | 27.81  | 0.79 | 29.13  | 0.77 | 28.71  | 0.78 | 27.41  | 0.10  |
| CL 72:9                       | 18:2/18:2/18:2/18:3 | 4.50      | 0.56 | 6.78  | 0.25 | 7.25  | 1.17 | 5.69    | 0.56 | 4.89     | 0.95 | 5.46   | 0.64 | 6.37    | 0.84 | 4.64   | 0.33 | 5.86   | 0.40 | 5.64   | 0.34 | 6.06   | 0.71  |
| CL 72:8                       | 18:2/18:2/18:2/18:2 | 12.34     | 1.63 | 16.41 | 1.01 | 18.31 | 1.94 | 15.40   | 0.16 | 11.90    | 1.79 | 16.40  | 0.32 | 18.33   | 0.55 | 14.67  | 0.41 | 17.31  | 0.56 | 15.73  | 0.28 | 12.95  | 0.10  |
| Distribution (%)              |                     | SdhC      |      | SdhD  |      | CytC1 |      | UQCRC-Q |      | UQCRC-C1 |      | COX5A  |      | COX6C   |      | ATP6   |      | ATP7   |      | ATPb   |      | ATP12  |       |
| Knockdown target:<br>CL group | Major species       | Mean      | SD   | Mean  | SD   | Mean  | SD   | Mean    | SD   | Mean     | SD   | Mean   | SD   | Mean    | SD   | Mean   | SD   | Mean   | SD   | Mean   | SD   | Mean   | SD    |
| CL 64:4                       | 16:1/16:1/16:1/16:1 | 1.34      | 0.07 | 1.85  | 0.22 | 4.42  | 0.44 | 4.76    | 0.06 | 8.82     | 0.99 | 3.20   | 0.35 | 3.87    | 0.08 | 4.15   | 0.23 | 3.35   | 0.60 | 3.05   | 3.25 | 0.13   | 4.88  |
| CL 66:6                       | 16:1/16:1/16:1/18:3 | 1.24      | 0.13 | 1.68  | 0.40 | 2.22  | 0.23 | 1.85    | 0.13 | 3.01     | 0.13 | 1.70   | 0.31 | 1.94    | 0.16 | 1.86   | 0.20 | 1.78   | 0.18 | 2.60   | 0.45 | 2.20   | 0.94  |
| CL 66:5                       | 16:1/16:1/16:1/18:2 | 5.40      | 0.19 | 6.77  | 1.47 | 9.99  | 0.59 | 11.55   | 0.02 | 11.14    | 1.28 | 7.96   | 0.47 | 9.73    | 0.34 | 6.08   | 0.17 | 5.80   | 0.75 | 10.25  | 1.48 | 7.56   | 0.21  |
| CL 68:7                       | 16:1/16:1/18:2/18:3 | 4.57      | 0.30 | 4.69  | 0.88 | 4.56  | 0.12 | 4.38    | 0.05 | 5.46     | 0.88 | 4.00   | 0.30 | 4.35    | 0.29 | 4.43   | 0.64 | 3.95   | 0.66 | 4.57   | 1.46 | 5.23   | 1.78  |
| CL 68:6                       | 16:1/16:1/18:2/18:2 | 15.36     | 0.03 | 17.49 | 2.00 | 20.91 | 0.85 | 23.54   | 0.08 | 17.58    | 0.69 | 19.04  | 0.22 | 21.24   | 0.45 | 13.82  | 0.83 | 13.72  | 1.18 | 15.23  | 2.18 | 17.78  | 1.43  |
| CL 70:8                       | 16:1/18:2/18:2/18:3 | 9.09      | 0.33 | 8.78  | 0.21 | 7.62  | 0.11 | 6.25    | 0.04 | 8.63     | 1.48 | 7.57   | 0.31 | 7.32    | 0.32 | 9.15   | 0.26 | 8.70   | 0.96 | 7.34   | 1.53 | 9.24   | 2.41  |
| CL 70:7                       | 16:1/18:2/18:2/18:2 | 28.63     | 0.32 | 28.42 | 0.66 | 27.15 | 0.67 | 28.01   | 0.31 | 22.49    | 0.57 | 29.49  | 1.21 | 28.58   | 0.72 | 26.65  | 0.48 | 26.82  | 0.74 | 23.09  | 1.48 | 27.87  | 2.94  |
| CL 72:9                       | 18:2/18:2/18:2/18:3 | 9.83      | 0.13 | 8.93  | 1.38 | 6.99  | 0.35 | 4.49    | 0.07 | 7.84     | 0.42 | 7.18   | 0.60 | 6.06    | 0.81 | 10.53  | 1.55 | 10.67  | 1.18 | 8.58   | 0.55 | 8.12   | 1.73  |
| CL 72:8                       | 18:2/18:2/18:2/18:2 | 24.54     | 0.71 | 21.38 | 3.17 | 16.14 | 0.79 | 15.17   | 0.05 | 15.04    | 0.27 | 19.85  | 1.05 | 16.92   | 0.35 | 23.33  | 0.52 | 25.21  | 2.67 | 21.88  | 2.58 | 18.76  | 16.01 |

Table 5. Rate constants and half-lives of CL species from *Drosophila* flight muscle. The fractional syntheses of individual CL species were measured at 12 different time points (1-9 days). Rate constants were estimated by non-linear regression. Half-life times were calculated from the rate constants.

| Drosophila strain | CL species | Turnover rate constant $\pm$ SE<br>( $10^{-3}$ day $^{-1}$ ) | Half life time<br>(days) |
|-------------------|------------|--------------------------------------------------------------|--------------------------|
| WT                | CL 66:5    | 1.2 $\pm$ 0.2                                                | 567                      |
|                   | CL 68:6    | 1.4 $\pm$ 0.2                                                | 492                      |
|                   | CL 68:5    | 3.8 $\pm$ 0.6                                                | 182                      |
|                   | CL 70:7    | 1.8 $\pm$ 0.3                                                | 376                      |
|                   | CL 70:6    | 3.6 $\pm$ 0.5                                                | 194                      |
|                   | CL 72:8    | 3.8 $\pm$ 0.5                                                | 181                      |
| $\Delta$ TAZ      | CL 66:5    | 24.9 $\pm$ 2.2                                               | 28                       |
|                   | CL 66:4    | 40.4 $\pm$ 4.0                                               | 17                       |
|                   | CL 68:6    | 28.9 $\pm$ 1.3                                               | 24                       |
|                   | CL 68:5    | 41.1 $\pm$ 3.2                                               | 17                       |
|                   | CL 68:4    | 66.9 $\pm$ 6.1                                               | 10                       |
|                   | CL 70:7    | 26.0 $\pm$ 1.0                                               | 27                       |
|                   | CL 70:6    | 28.5 $\pm$ 1.1                                               | 24                       |

Table 6. Number of lipid molecules associated with each OXPHOS complex. The numbers were calculated from the molecular mass of the complexes, assuming a lipid-to-protein mass ratio of 22:78 and an average lipid mass of 750 Da.

| Complex          | Mass<br>(10 <sup>6</sup> Da) | Number of lipids |
|------------------|------------------------------|------------------|
| I                | 1.0                          | 376              |
| II               | 0.1                          | 38               |
| III <sub>2</sub> | 0.5                          | 188              |
| IV               | 0.2                          | 75               |
| V                | 0.6                          | 226              |
